# Supplementary material
Source: PubMed Central journal article supplement (PMC3479485)
Supplement: 1215060109_pnas.1215060109_SI.pdf [file 1215060109_pnas.1215060109_SI.pdf]

# Supporting Information

Vogel et al. 10.1073/pnas.1215060109

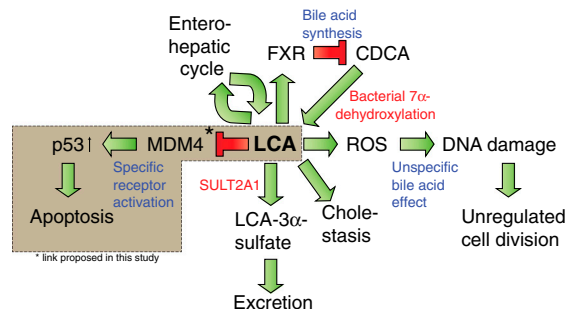

**Fig. S1.** Regulatory pathway of lithocholic acid (LCA). LCA is a secondary bile acid formed by bacteria in the gut from its precursor chenodeoxycholic acid (CDCA). It is a rare example of a toxic endobiotic that can lead to cholestasis and that is efficiently detoxicated by conjugation with taurine or glycine and sulfation at C-3 by the sulfotransferase SULT2A1. LCA induces its own metabolism by activating nuclear receptors like FXR, thereby inhibiting the synthesis of bile acids and promoting the transcription of genes encoding for sulfotransferases. LCA also activates the vitamin D receptor in a concentration-dependent manner and thereby induces its own detoxification by CYP3A enzymes. Perhaps MDM4 has the role of an intracellular lithocholic acid sensor that initiates programmed cell death at pathological LCA concentrations.

**Table S1. Dissociation constants for bile acids and derivatives from MDM4**

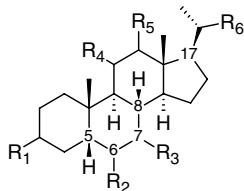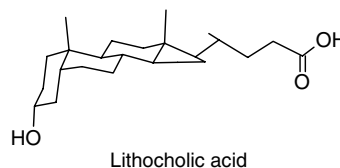

| Common name                                  | R <sub>1</sub>          | R <sub>2</sub> | R <sub>3</sub> | R <sub>4</sub> | R <sub>5</sub> | R <sub>6</sub>                        | Conjugate | Additional feature              | K <sub>D</sub> [μM] |
|----------------------------------------------|-------------------------|----------------|----------------|----------------|----------------|---------------------------------------|-----------|---------------------------------|---------------------|
| Lithocholic acid                             | .....OH                 | H              | H              | H              | H              | CH <sub>2</sub> CH <sub>2</sub> COOH  | —         | —                               | 12                  |
| 5β-Cholanic acid-3-one                       | ====O                   | H              | H              | H              | H              | CH <sub>2</sub> CH <sub>2</sub> COOH  | —         | —                               | 80                  |
| (Acetyloxylithocholic acid)                  | .....OAc                | H              | H              | H              | H              | CH <sub>2</sub> CH <sub>2</sub> COOH  | —         | —                               | 110                 |
| Lithocholic acid 3-sulfate                   | .....OSO <sub>3</sub> H | H              | H              | H              | H              | CH <sub>2</sub> CH <sub>2</sub> COOH  | —         | —                               | 210                 |
| 5,6-Dehydrolithocholic acid                  | .....OH                 | —              | H              | H              | H              | CH <sub>2</sub> CH <sub>2</sub> COOH  | —         | Δ <sup>5</sup>                  | 400                 |
| Ergosterol                                   | —OH                     | —              | —              | H              | H              | CH <sub>2</sub> CH <sub>2</sub> COOH  | —         | Δ <sup>5</sup> , Δ <sup>7</sup> | nb*                 |
| Taurolithocholic acid                        | .....OH                 | H              | H              | H              | H              | CH <sub>2</sub> CH <sub>2</sub> COOH  | Taurine   | —                               | 200                 |
| Taurolithocholic acid-3-sulfate              | .....OSO <sub>3</sub> H | H              | H              | H              | H              | CH <sub>2</sub> CH <sub>2</sub> COOH  | Taurine   | —                               | 120                 |
| Hyodeoxycholic acid                          | .....OH                 | .....OH        | H              | H              | H              | CH <sub>2</sub> CH <sub>2</sub> COOH  | —         | —                               | nb*                 |
| Hyodeoxycholic acid methyl ester             | .....OH                 | .....OH        | H              | H              | H              | CH <sub>2</sub> CH <sub>2</sub> COOMe | —         | —                               | nb*                 |
| 5β-Cholanic acid-3α-ol-6-one                 | .....OH                 | ====O          | H              | H              | H              | CH <sub>2</sub> CH <sub>2</sub> COOH  | —         | —                               | nb*                 |
| Chenodeoxycholic acid                        | .....OH                 | H              | .....OH        | H              | H              | CH <sub>2</sub> CH <sub>2</sub> COOH  | —         | —                               | 280                 |
| 5β-Cholanic acid-3,7-dione                   | ====O                   | H              | ====O          | H              | H              | CH <sub>2</sub> CH <sub>2</sub> COOH  | —         | —                               | nb*                 |
| Taurichenodeoxycholic acid                   | .....OH                 | H              | .....OH        | H              | H              | CH <sub>2</sub> CH <sub>2</sub> COOH  | Taurine   | —                               | 280                 |
| Glycochenodeoxycholic acid                   | .....OH                 | H              | .....OH        | H              | H              | CH <sub>2</sub> CH <sub>2</sub> COOH  | Glycine   | —                               | 310                 |
| Ursodeoxycholic acid                         | .....OH                 | H              | —OH            | H              | H              | CH <sub>2</sub> CH <sub>2</sub> COOH  | —         | —                               | nb*                 |
| Deoxycholic acid                             | .....OH                 | H              | H              | H              | .....OH        | CH <sub>2</sub> CH <sub>2</sub> COOH  | —         | —                               | 240                 |
| 8α-Hydroxytaurodeoxycholic acid <sup>†</sup> | .....OH                 | H              | H              | H              | .....OH        | CH <sub>2</sub> CH <sub>2</sub> COOH  | Taurine   | .....OH at C-8                  | nb*                 |
| Taurodeoxycholic acid                        | .....OH                 | H              | H              | H              | .....OH        | CH <sub>2</sub> CH <sub>2</sub> COOH  | Taurine   | —                               | 250                 |
| Glycodeoxycholic acid                        | .....OH                 | H              | H              | H              | .....OH        | CH <sub>2</sub> CH <sub>2</sub> COOH  | Glycine   | —                               | 300                 |
| Cholic acid                                  | .....OH                 | H              | .....OH        | H              | .....OH        | CH <sub>2</sub> CH <sub>2</sub> COOH  | —         | —                               | 1,100 <sup>‡</sup>  |
| Dehydrocholic acid                           | ====O                   | H              | ====O          | H              | ====O          | CH <sub>2</sub> CH <sub>2</sub> COOH  | —         | —                               | nb*                 |
| Glycocholic acid                             | .....OH                 | H              | .....OH        | H              | .....OH        | CH <sub>2</sub> CH <sub>2</sub> COOH  | Glycine   | —                               | 1,500 <sup>‡</sup>  |
| Taurocholic acid                             | .....OH                 | H              | .....OH        | H              | .....OH        | CH <sub>2</sub> CH <sub>2</sub> COOH  | Taurine   | —                               | nb*                 |

| Common name                                                     | $R_1$   | $R_2$ | $R_3$   | $R_4$   | $R_5$   | $R_6$                                 | Conjugate | Additional feature | $K_D$ [ $\mu$ M] |
|-----------------------------------------------------------------|---------|-------|---------|---------|---------|---------------------------------------|-----------|--------------------|------------------|
| 7-Oxodeoxycholic acid methyl ester                              | .....OH | H     | ====O   | H       | .....OH | CH <sub>2</sub> CH <sub>2</sub> COOMe | —         | —                  | nb*              |
| 12-Oxochenodeoxycholic acid                                     | .....OH | H     | .....OH | H       | ====O   | CH <sub>2</sub> CH <sub>2</sub> COOMe | —         | —                  | nb*              |
| Cholesterol                                                     | —OH     | H     | H       | .....OH | H       | Isopropyl                             | —         | —                  | nb*              |
| 5 $\beta$ -Pregnane-3 $\alpha$ ,20 $\alpha$ -diol               | .....OH | H     | H       | H       | H       | OH                                    | —         | —                  | nb*              |
| 5 $\beta$ -Pregnane-3 $\alpha$ ,17 $\alpha$ ,20 $\alpha$ -triol | .....OH | H     | H       | H       | H       | OH                                    | —         | .....OH at C-17    | 200              |

\*No binding event detectable by change of fluorescence anisotropy within concentration range.

†Compound AE-562/12222313 from Specs with unknown stereochemistry at C-5, C-9, and C-14.

‡ $K_D$  values are calculated from extrapolated IC<sub>50</sub> values.
